# Supplementary material for: Evaluation of laser ablation double-focusing SC-ICPMS for “common” lead isotopic measurements in silicate glasses and minerals
Source: Royal Society of Chemistry journal article supplement (doi:10.1039/c7ja00005g), 2017-01-01
Supplement: c7ja00005g8.pdf [file c7ja00005g8.pdf]

**Table 2**  
Reference materials

|                                  | Pb<br>μg g <sup>-1</sup> | SiO <sub>2</sub><br>wt. % | FeO <sup>Ta</sup><br>wt. % | Material type      | Locality                  |
|----------------------------------|--------------------------|---------------------------|----------------------------|--------------------|---------------------------|
| Synthetic glasses <sup>b</sup> : |                          |                           |                            |                    |                           |
| NIST SRM610 glass                | 426                      | ~72                       | tr.                        |                    |                           |
| NIST SRM612 glass                | 38.6                     | ~72                       | tr.                        |                    |                           |
| USGS glasses <sup>c</sup> :      |                          |                           |                            |                    |                           |
| BCR-2G                           | ~10                      | 54.9                      | 12.6                       | Basalt             | Columbia River Basalt     |
| BHVO-2G                          | ~2                       | 50.5                      | 11.2                       | Basalt             | Kilauea, Hawaii           |
| Natural materials <sup>d</sup> : |                          |                           |                            |                    |                           |
| St. Gotthard                     | ~130                     | n.d.                      | n.d.                       | Adularia           | St. Gotthard, Switzerland |
| Inyo                             | ~25                      | n.d.                      | n.d.                       | Obsidian glass     | Inyo Craters, California  |
| Haer                             | ~4                       | n.d.                      | n.d.                       | Sanidine megacryst | Haer Volcano, Mongolia    |
| MPI-DING glasses <sup>e</sup> :  |                          |                           |                            |                    |                           |
| GOR132-G                         | 19.5                     | 45.8                      | 10.1                       | Komatiite          | Gorgona Island            |
| T1-G                             | 11.6                     | 58.6                      | 6.5                        | Quartz diorite     | Italian Alps              |
| StHs6/80-G                       | 10.3                     | 63.8                      | 4.4                        | Andesitic ash      | Mount St. Helens          |
| ATHO-G                           | 5.7                      | 75.8                      | 3.2                        | Rhyolite           | Iceland                   |
| KL2-G                            | 2.1                      | 50.4                      | 10.7                       | Basalt             | Kilauea, Hawaii           |
| ML3B-G                           | 1.4                      | 51.0                      | 11.0                       | Basalt             | Mauna Loa, Hawaii         |

<sup>a</sup>Total iron expressed as FeO.

<sup>b</sup>The element concentrations are the NIST certificate values. These reference materials have only a trace (tr.) of iron.

<sup>c</sup>The element concentrations are the certificate values for the corresponding USGS powdered whole-rock reference material.

<sup>d</sup>The approximate Pb concentrations were measured on dissolved mineral or glass chips at the USGS SWIRL by quadrupole ICPMS. The major element abundances of these materials were not determined (n.d.).

<sup>e</sup>The element concentrations are from Jochum et al.<sup>31,34</sup>
